# Supplementary material
Source: PubMed Central journal article supplement (PMC3831454)
Supplement: 1313965110_pnas.201313965SI.pdf [file 1313965110_pnas.201313965SI.pdf]

# Supporting Information

Bobenchik et al. 10.1073/pnas.1313965110

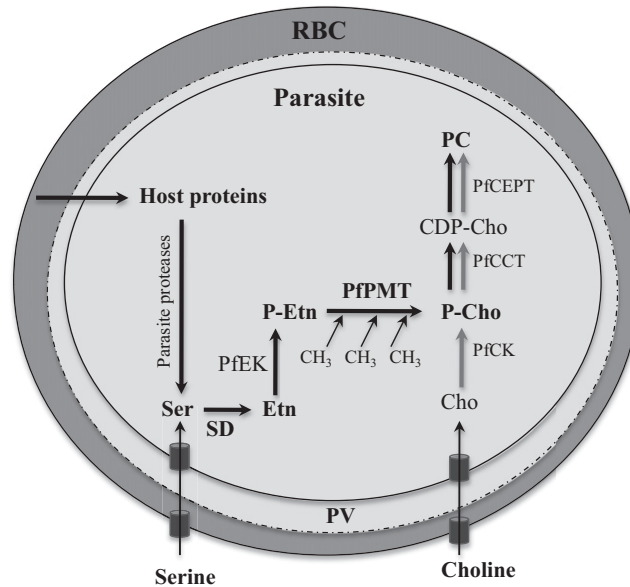

**Fig. S1.** Schematic representation of major phosphatidylcholine (PC) biosynthesis pathways in *Plasmodium falciparum*-infected erythrocyte. The serine decarboxylase-phosphoethanolamine methyltransferase (SDPM) pathway is depicted with black arrows. The cytidine diphosphate (CDP)-choline pathway is shown with gray arrows. CDP-cho, CDP-choline; Cho, choline; Etn, ethanolamine; PC, phosphatidylcholine; P-Etn, phosphoethanolamine; PfCCT, choline cytidyltransferase; PfCEPT, choline/ethanolamine phosphotransferase; PfCK, choline kinase; PfSD, serine decarboxylase; PfEK, ethanolamine kinase; PV, parasitophorous vacuole; RBC, red blood cell; Ser, serine.

## Other Supporting Information Files

[Dataset S1 \(XLSX\)](#)

[Dataset S2 \(XLSX\)](#)
